# Supplementary material for: Molecular and functional evaluation of a novel HIF inhibitor, benzopyranyl 1,2,3-triazole compound
Source: PubMed Central journal article supplement (PMC5352362; doi:10.18632/oncotarget.13955), 2016-12-15
Supplement: oncotarget-08-7801-s001.pdf [file oncotarget-08-7801-s001.pdf]

## Molecular and functional evaluation of a novel HIF inhibitor, benzopyranyl 1,2,3-triazole compound

### Supplementary Materials

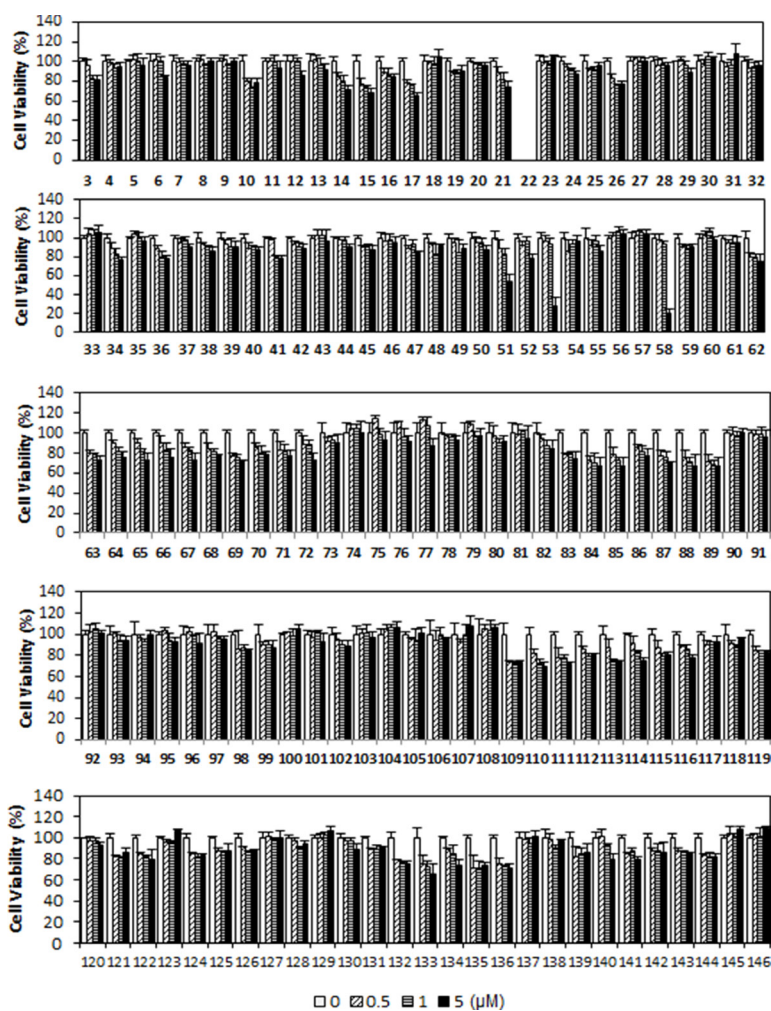

**Supplementary Figure S1: Cytotoxicity of chemicals from house libraries.** MTT Assay was performed with chemicals (Compound 3 to 146) at indicated doses in HEK -293 cells.

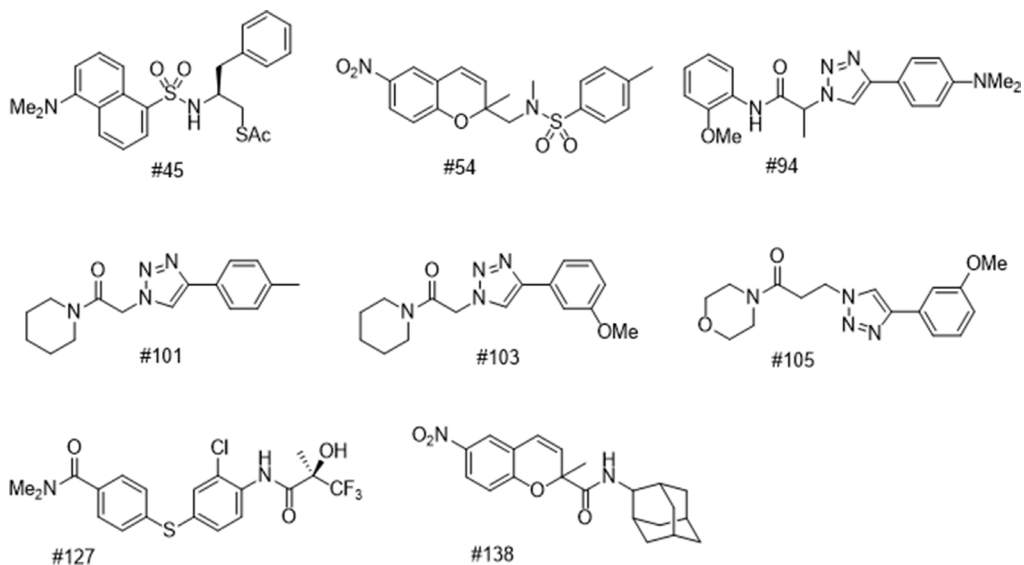

Supplementary Figure S2: Chemical structures of candidates for HIF-1 $\alpha$  inhibitors identified both by HRE-luciferase activity (Figure 1) and western blot analysis in Figure 2.

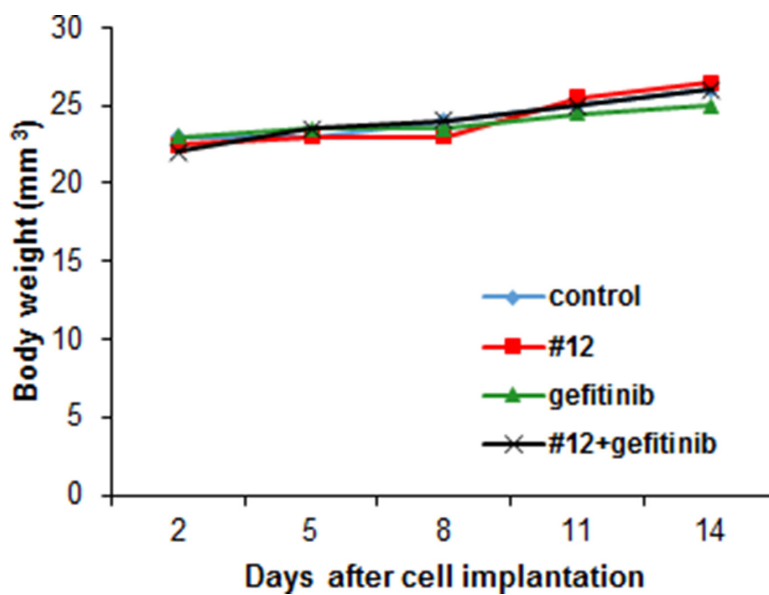

Supplementary Figure S3: The body weight of allograft mice as described in Figure 6A.
